# Supplementary material
Source: Springer Nature journal article supplement (https://www.springermedizin.de/resource/supplementary/12889_2009_1688_MOESM5_ESM.pdf/9503732)

Average  
cigarettes  
per day

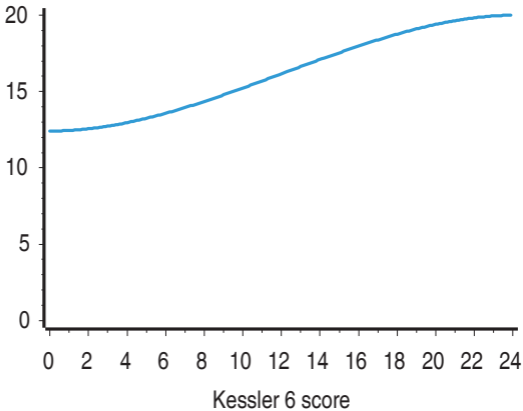

Supplement: MOESM5 [file 9503732]
